# Supplementary material
Source: Springer Nature journal article supplement (https://www.springermedizin.de/resource/supplementary/12936_2012_2466_MOESM2_ESM.pdf/9543020)

Starting concentration, ng/mL

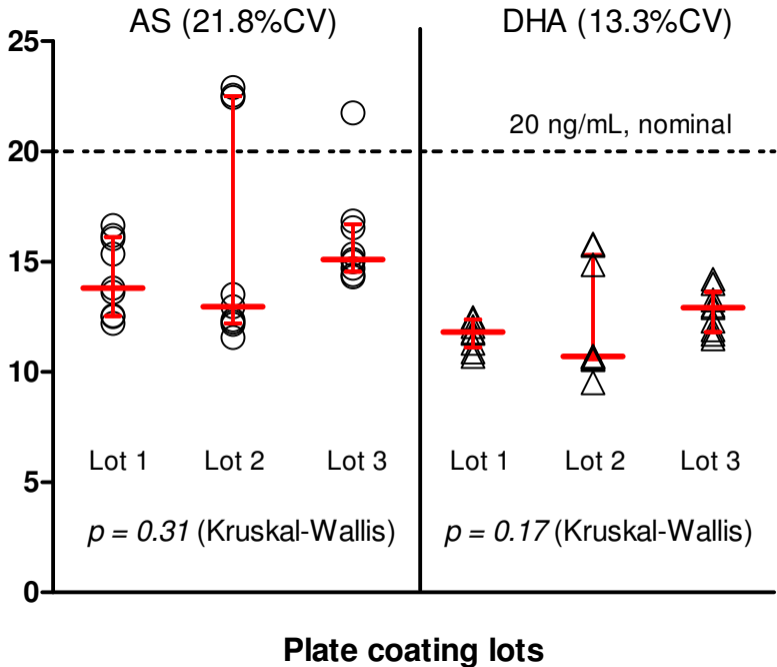

Supplement: MOESM2 [file 9543020]
